# Supplementary material
Source: Research Square preprint supplement (doi:10.21203/rs.3.rs-9108360/v1)
Supplement: Supplementary file 1 [file 7accd505a3c9339566274384.pdf]

**Humanized diet and thermoneutral housing enable sex-aware dissection of the  
MASLD-T2D-CVD triad**  
*Supplementary information*

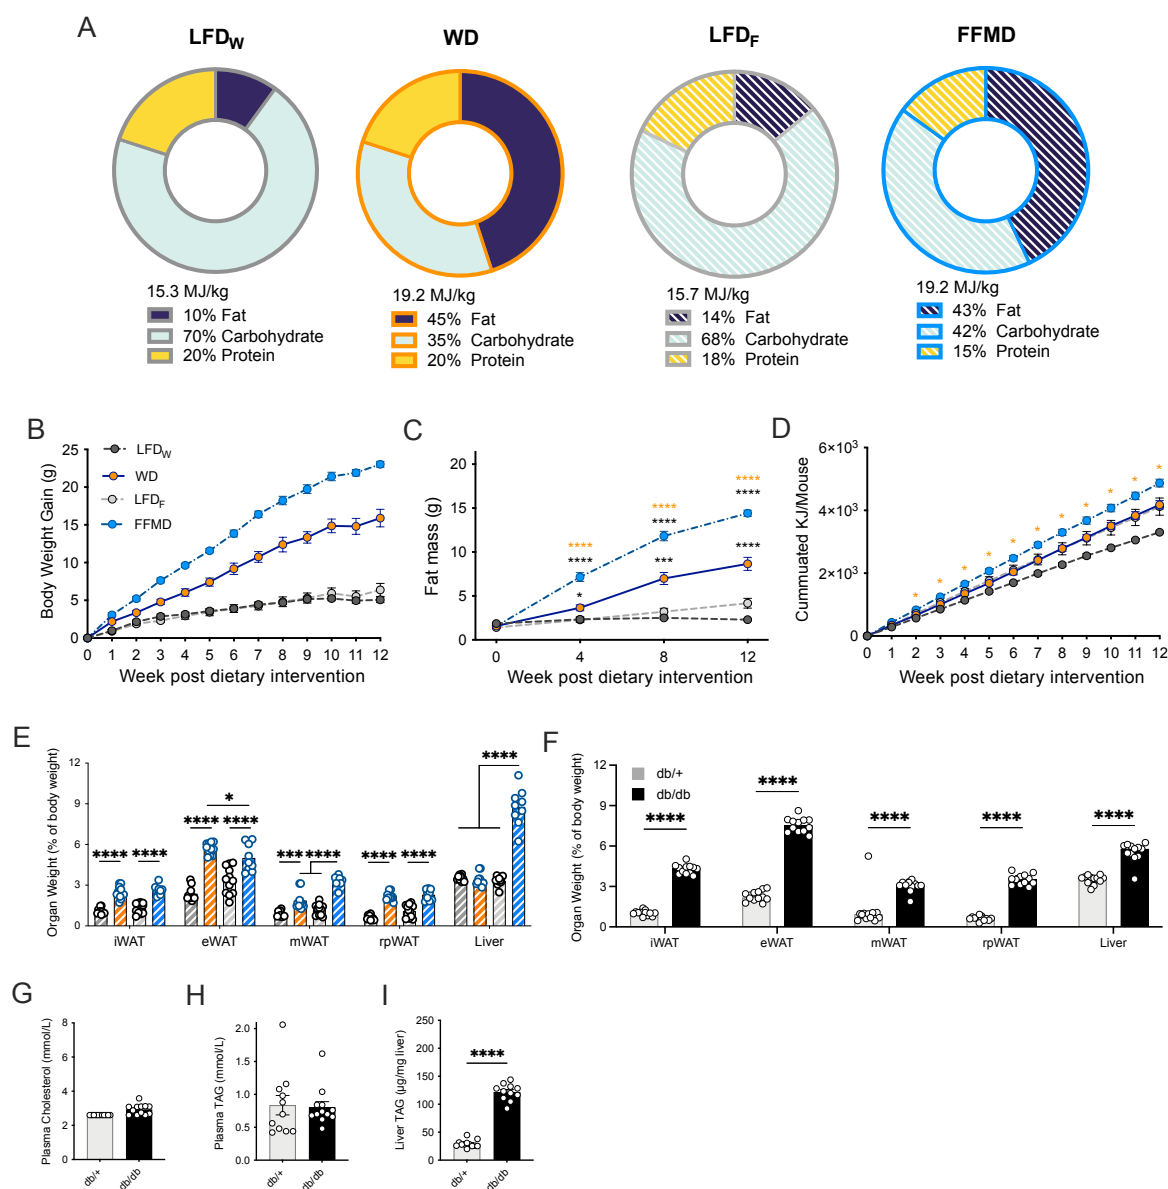

**Figure S1.** (A) Macronutrient distribution of experimental rodent diets. (B) Weight development of WT mice. (C) Fat mass development over time as assessed by magnetic resonance imaging (MRI). Black stars indicate significance from respective LFD group, coloured stars indicate significance from experimental group of that color. (D) Cumulative energy intake/mouse over the entire study. Relative organ weights of WT mice (E) and db/db mice (F). db/db plasma levels of cholesterol (G) and TAG (H), with liver TAG depicted in I. N = 8-12 per group, with individual data points representing each mouse. All data is presented as mean  $\pm$  SEM. When comparing more than two groups, data were analysed with a one-way ANOVA with Tukey's multiple comparison test, and when comparing two groups a two-tailed unpaired t-test was performed. Statistical significance was considered at  $p < 0.05$ , where \* =  $p < 0.05$ , \*\* =  $p < 0.01$ , \*\*\* =  $p < 0.001$ , \*\*\*\* =  $p < 0.0001$ .

**A**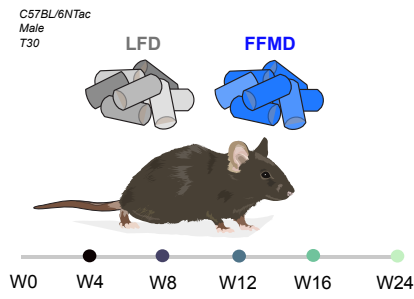**B**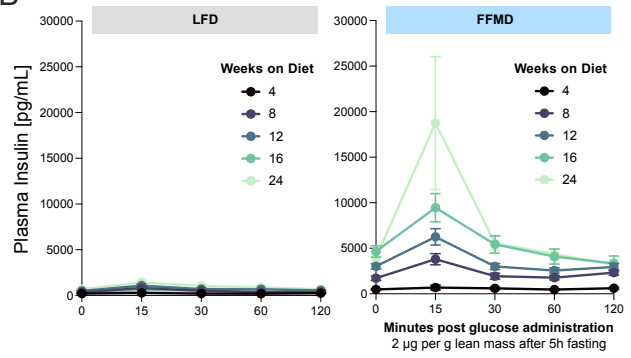**C**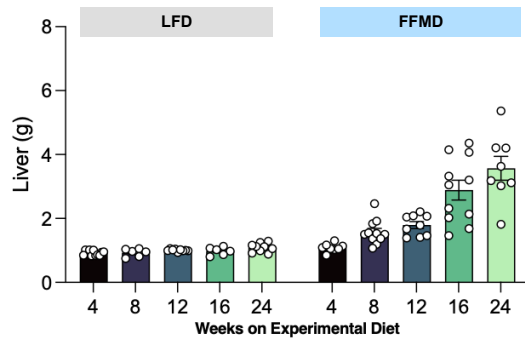**D**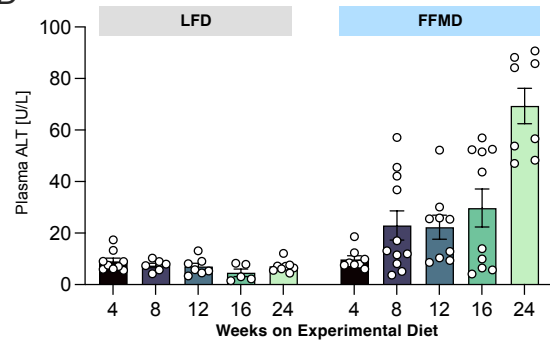**E**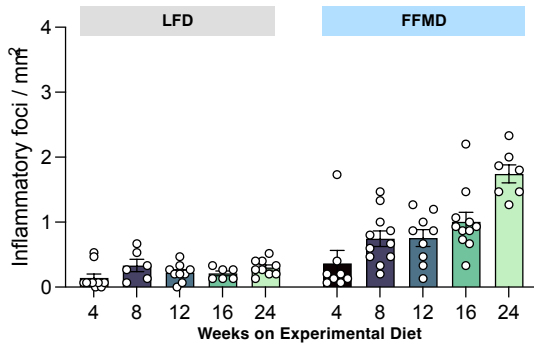**F**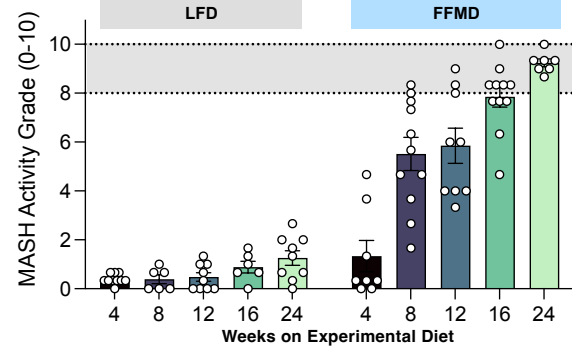**G**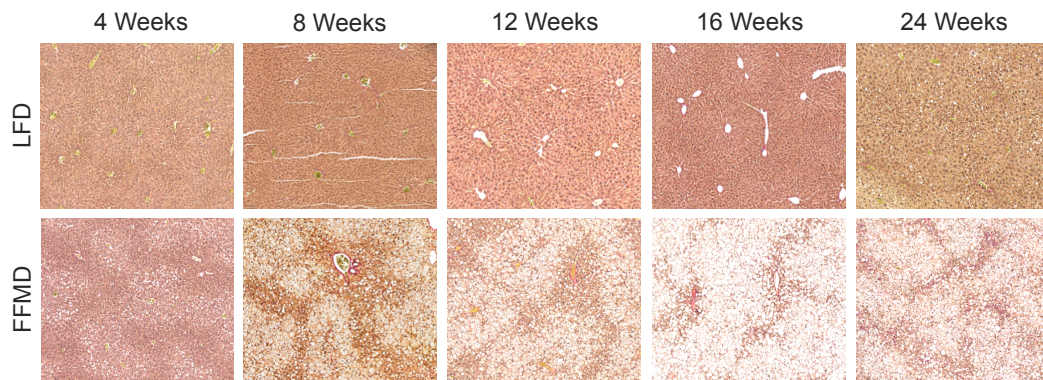

**Figure S2.** (A) Schematic of study design. (B) Plasma insulin levels after an oGTT following 4-24 weeks of FFMD-feeding. (C) Liver wet weights over time. (D) Plasma ALT levels over time. (E) Hepatic inflammatory foci per HPF over time. (F) MASH scoring over time. The grey shaded area of 8-10 indicates frank MASH. (G) Representative histology pictures. N = 6-12 per group, with individual data points representing each mouse. All data is presented as mean  $\pm$  SEM. Data were analysed with a one-way ANOVA with Tukey's multiple comparison test. Statistical significance was considered at  $p < 0.05$ , where \* =  $p < 0.05$ , \*\* =  $p < 0.01$ , \*\*\* =  $p < 0.001$ , \*\*\*\* =  $p < 0.0001$ .

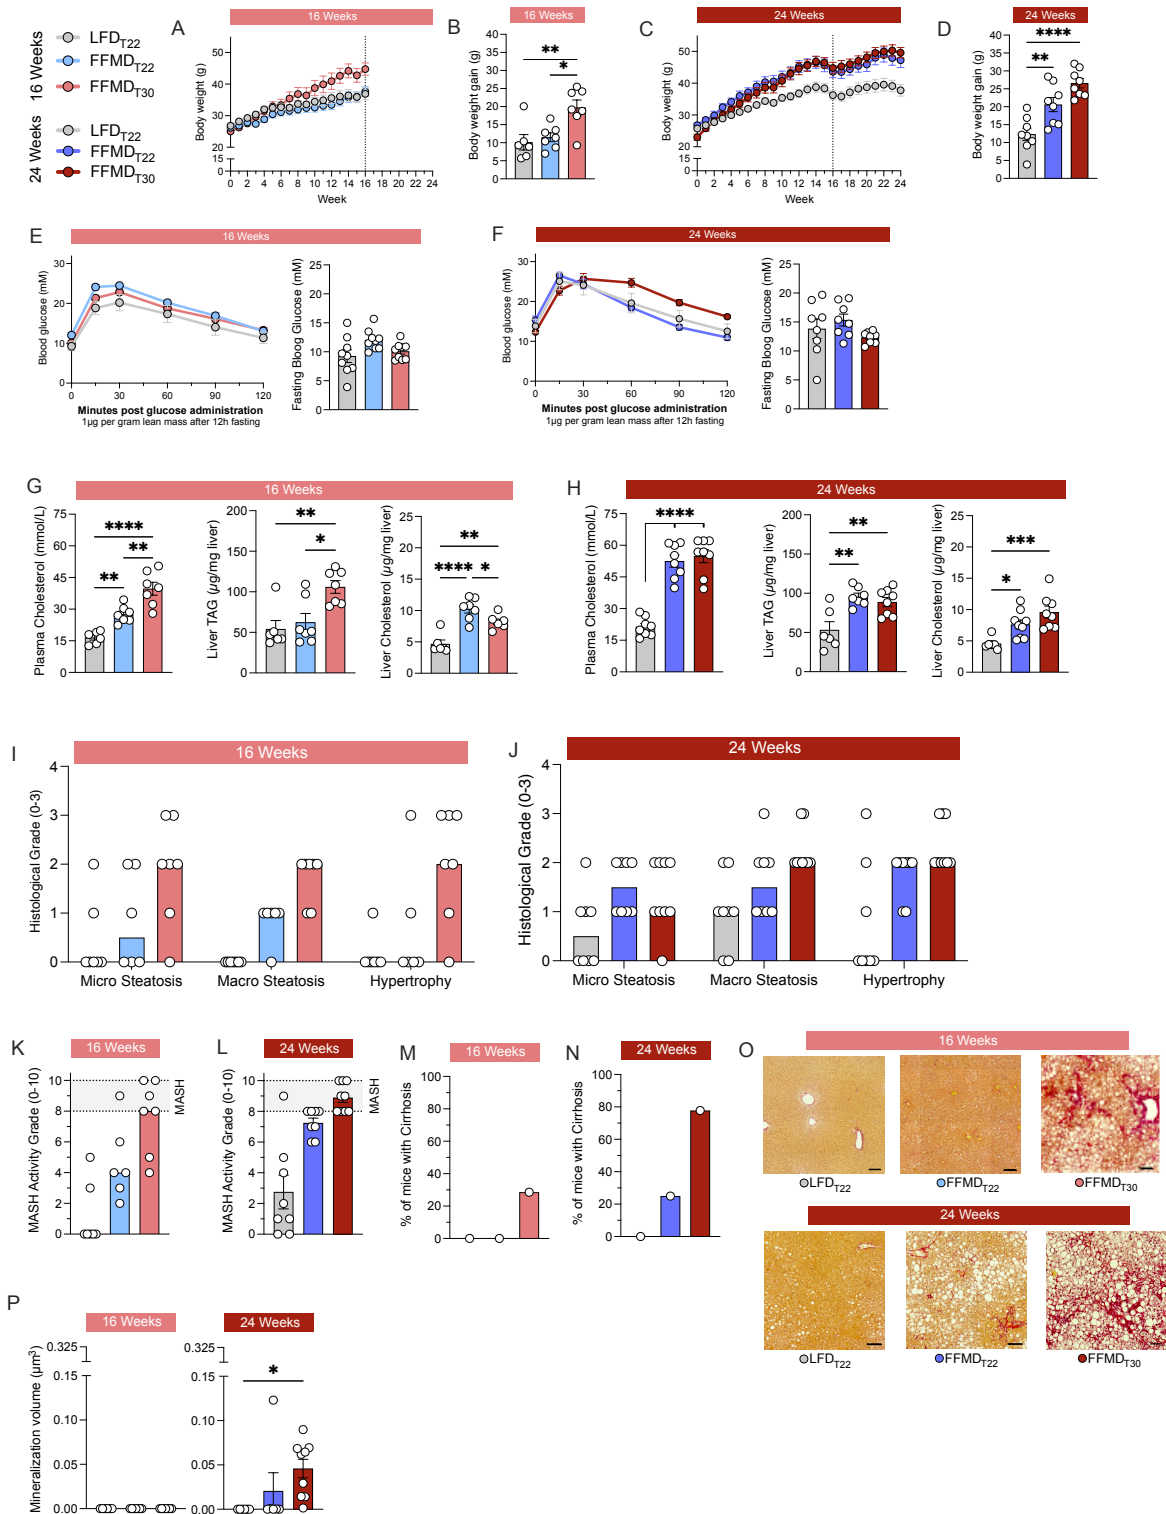

**Figure S3.** Body weight development (A) of male IGFI mice with total weight gain (B) after 16 weeks of feeding, with corresponding measurements after 24 weeks of feeding in C and D. Blood glucose levels during an oGTT at 16 weeks (E) and 24 weeks (F). Plasma cholesterol levels at 16 weeks (G) and 24 weeks (H). Histological grading of steatosis and hypertrophy shown as the median after 16 week (I) and 24 weeks (J) of feeding. MASH activity grading

after 16 weeks (K) and 24 weeks (L) - the grey shaded area of 8-10 indicates frank MASH. Fraction of mice with frank cirrhosis after 16 weeks (M) and 24 weeks (N). (O) Representative histology pictures. Scale bars = 100  $\mu\text{m}$ . (P) Aortic mineralization volumes in  $\mu\text{m}^3$ . N = 8-9 per group, with individual data points representing each mouse. All data is presented as mean  $\pm$  SEM unless otherwise indicated. Data were analysed with a one-way ANOVA with Tukey's multiple comparison test. Statistical significance was considered at  $p < 0.05$ , where \* =  $p < 0.05$ , \*\* =  $p < 0.01$ , \*\*\* =  $p < 0.001$ , \*\*\*\* =  $p < 0.0001$ .

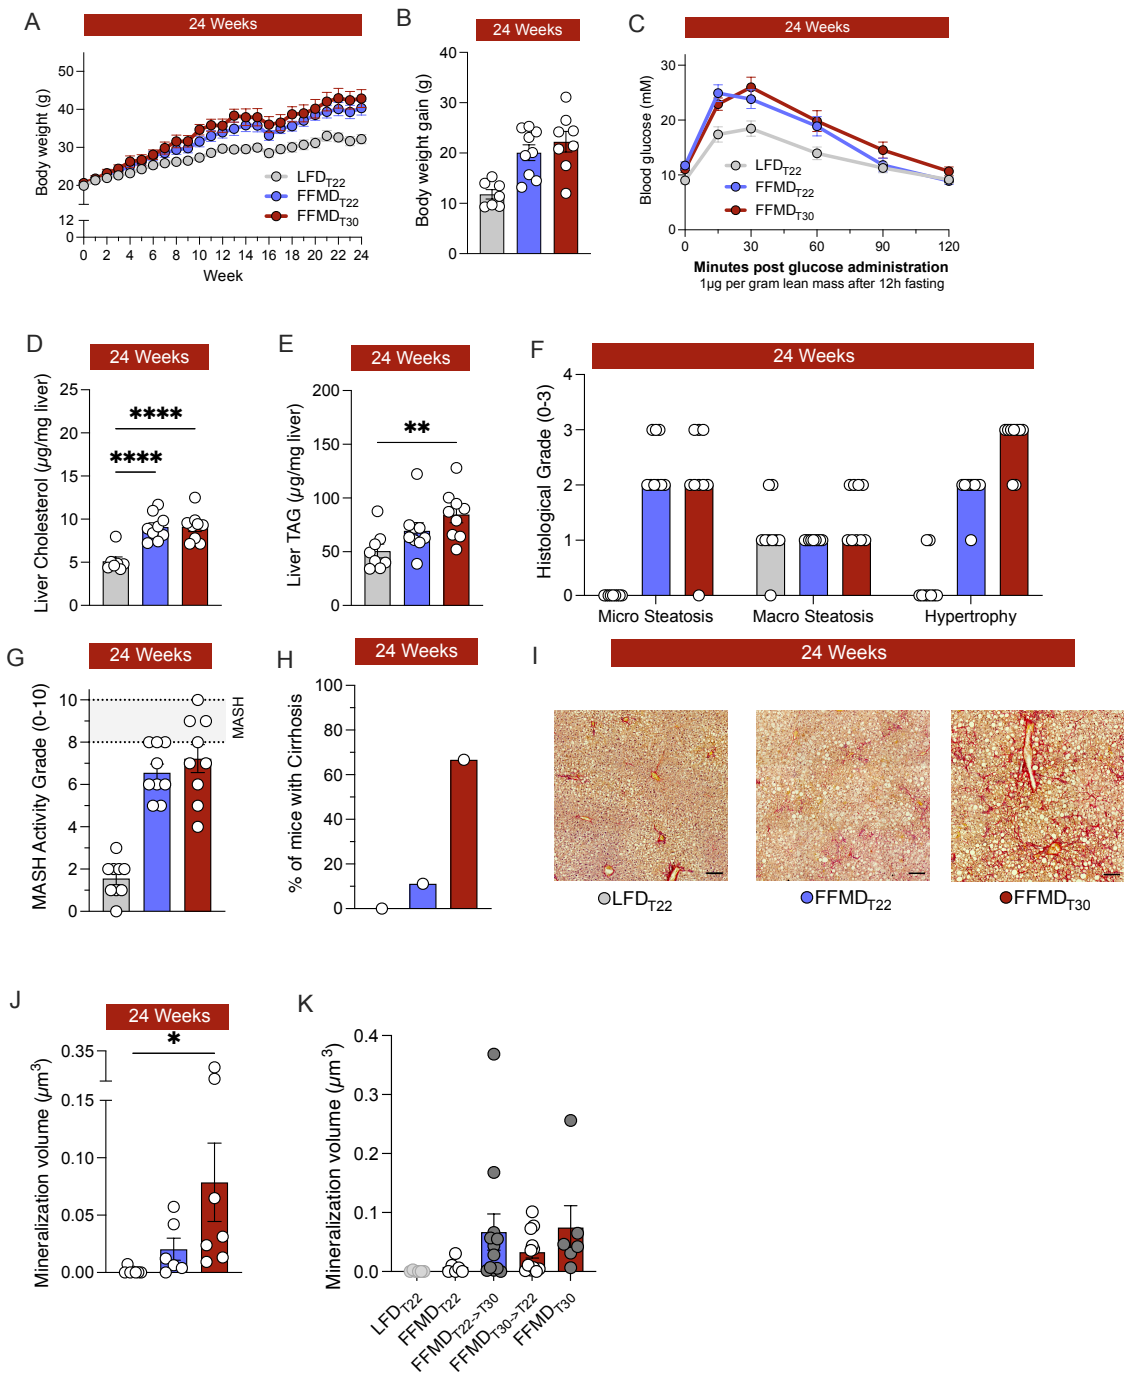

**Figure S4.** Body weight development (A) of female IGFII mice with total weight gain (B) after 24 weeks of feeding. Blood glucose levels during an oGTT at 24 weeks (C). Liver cholesterol (D) and TAG (E) levels at 24 weeks. (F) Histological grading of steatosis and hypertrophy shown as the median. (G) MASH activity grading 24 weeks - the grey shaded area of 8-10 indicates frank MASH. (H) Fraction of mice with frank cirrhosis. (I) Representative histology pictures. Scale bars = 100 µm. Aortic mineralization volumes in µm<sup>3</sup> for the 24 week females (J) and the crossover cohort (K). N = 8-9 per group and 17-18 in temperature-swapping groups, with individual data points representing each mouse. All data is presented as mean ± SEM unless otherwise indicated. Data were analysed with a one-way ANOVA with Tukey's

multiple comparison test. Statistical significance was considered at  $p < 0.05$ , where \* =  $p < 0.05$ , \*\* =  $p < 0.01$ , \*\*\* =  $p < 0.001$ , \*\*\*\* =  $p < 0.0001$ .

***Table S1. Diet compositions***

| <b>Table S1.</b> Composition of diets. |                |            |       |                             |                                 |                     |
|----------------------------------------|----------------|------------|-------|-----------------------------|---------------------------------|---------------------|
|                                        | <b>Protein</b> | <b>Fat</b> |       | <b>Low Fat Diet Control</b> | <b>Fast-Food Mimicking Diet</b> | <b>Western Diet</b> |
| Ingredient                             | Content        | Content    | U     | Mixed Protein               | Mixed Protein                   | 45 kcal% Fat        |
| Product No.                            |                |            |       | S9552-E026                  | S9552-E024                      | S9552-E060          |
| Casein                                 | 87             | <0.6       | %     | 3,000                       | 3,000                           |                     |
| Poultry protein                        | 71             | 10         | %     | 8,500                       | 8,500                           | 25,000              |
| Soyprotein isolate                     | 88             | 0,4        | %     | 4,900                       | 4,900                           |                     |
| Wheat gluten, Vital                    | 76,5           | 1,7        | %     | 2,300                       | 2,300                           |                     |
| Egg yolk                               | 38             | 56         | %     | 1,600                       | 1,600                           |                     |
| Egg white                              | 79             | 0,1        | %     | 1,600                       | 1,600                           |                     |
| Whey powder, 71% Lactose               | 11,9           | 1          | %     | 2,9                         | 2,900                           |                     |
| L-Cystine                              | 72,2           |            | %     | 0,300                       | 0,300                           | 0,300               |
| Corn starch                            |                |            | %     | 45,260                      | 5,200                           | 7,000               |
| Maltodextrin                           |                |            | %     | 8,000                       | 8,000                           | 11,000              |
| Sucrose 1)                             |                |            | %     | 7,000                       | 24,400                          | 20,050              |
| Fructose 1)                            |                |            | %     |                             | 6,500                           |                     |
| Cellulose powder                       |                |            | %     | 5,000                       | 5,000                           | 5,700               |
| Vitamin premixture 2)                  |                |            | %     | 1,000                       | 1,000                           | 1,000               |
| Mineral premixture + additions 2)      |                |            | %     | 4,300                       | 4,300                           | 6,000               |
| Choline a (50%)                        |                |            | %     | 0,290                       | 0,290                           | 0,200               |
| L-Carnitine                            |                |            | %     | 0,050                       | 0,050                           |                     |
| Cholesterol                            |                |            | %     |                             | 0,150                           | 0,150               |
| Butylated hydroxytoluene               |                |            | %     | 0,010                       | 0,010                           |                     |
| Butter fat, dehydrated                 |                |            | %     | 2,1                         | 18,8                            |                     |
| Corn oil                               |                |            | %     | 1,62                        | 1,100                           |                     |
| Linseed oil                            |                |            | %     | 0,270                       | 0,100                           |                     |
| Pork lard                              |                |            | %     |                             |                                 | 20,800              |
| Soybean oil                            |                |            | %     |                             |                                 | 2,800               |
| <b>Proximate contents</b>              |                |            |       |                             |                                 |                     |
| Crude protein                          |                |            | %     | 17,2                        | 17,2                            | 22,100              |
| Crude fat                              |                |            | %     | 5,8                         | 21,8                            | 23,600              |
| Crude fibre                            |                |            | %     | 5,0                         | 5,1                             | 5,700               |
| Crude ash                              |                |            | %     | 4,8                         | 4,8                             | 5,400               |
| Starch                                 |                |            | %     | 43,5                        | 5,0                             | 6,700               |
| Dextrin                                |                |            | %     | 7,9                         | 7,9                             | 10,900              |
| Sugar (total)                          |                |            | %     | 10,2                        | 34,0                            | 21,100              |
| Energy (Atwater)                       |                |            | MJ/kg | 15,7                        | 19,2                            | 19,300              |
| kcal% Protein                          |                |            |       | 18                          | 15                              | 20,000              |
| kcal% Fat                              |                |            |       | 14                          | 43                              | 45,000              |
| kcal% Carbohydrates                    |                |            |       | 68                          | 42                              | 35,000              |
| Lysine                                 |                |            | %     | 0,95                        | 0,95                            | 1,83                |
| Methionine                             |                |            | %     | 0,43                        | 0,43                            | 0,78                |
| Methionine & Cystine                   |                |            | %     | 0,94                        | 0,94                            | 1,18                |
| Threonine                              |                |            | %     | 0,62                        | 0,62                            | 0,97                |
| Tryptophan                             |                |            | %     | 0,19                        | 0,19                            | 0,29                |
| Arginine                               |                |            | %     | 0,91                        | 0,91                            | 0,86                |
| Histidine                              |                |            | %     | 0,37                        | 0,37                            | 0,67                |
| Valine                                 |                |            | %     | 0,86                        | 0,86                            | 1,54                |
| Isoleucine                             |                |            | %     | 0,71                        | 0,71                            | 1,25                |
| Leucine                                |                |            | %     | 1,23                        | 1,23                            | 2,19                |
| Phenylalanine                          |                |            | %     | 0,74                        | 0,74                            | 1,14                |
| Phe + Tyr                              |                |            | %     | 1,29                        | 1,29                            | 2,31                |
| Glycine                                |                |            | %     | 0,96                        | 0,96                            | 0,47                |
| Glutamic acid                          |                |            | %     | 3,00                        | 3,00                            | 4,97                |
| Aspartic acid                          |                |            | %     | 1,36                        | 1,36                            | 1,64                |
| Proline                                |                |            | %     | 1,20                        | 1,20                            | 2,53                |
| Serine                                 |                |            | %     | 0,82                        | 0,82                            | 1,32                |
| Alanine                                |                |            | %     | 0,84                        | 0,84                            | 0,66                |
| <b>Fatty adds, % in the diet</b>       |                |            |       |                             |                                 |                     |
| c 4:0                                  |                |            |       | 0,08                        | 0,72                            |                     |
| c 6:0                                  |                |            |       | 0,05                        | 0,47                            |                     |
| c 8:0                                  |                |            |       | 0,03                        | 0,26                            |                     |
| c 10:0                                 |                |            |       | 0,06                        | 0,56                            | 0,03                |
| c 12:0                                 |                |            |       | 0,07                        | 0,64                            | 0,05                |
| c 14:0                                 |                |            |       | 0,24                        | 2,00                            | 0,29                |
| c 16:0                                 |                |            |       | 1,15                        | 5,50                            | 5,34                |
| c 18:0                                 |                |            |       | 0,36                        | 1,97                            | 2,92                |
| c 20:0                                 |                |            |       | 0,02                        | 0,04                            | 0,07                |
| c 16:1                                 |                |            |       | 0,13                        | 0,43                            | 0,62                |
| c 18:1                                 |                |            |       | 1,68                        | 5,16                            | 9,42                |
| c 18:2                                 |                |            |       | 1,21                        | 1,21                            | 3,45                |
| c 18:3                                 |                |            |       | 0,17                        | 0,17                            | 0,37                |
| Cholesterol                            |                |            | mg/kg | ~440                        | ~2340                           | ~1580               |
| Calcium                                |                |            | %     | 0,82                        | 0,82                            | 0,92                |
| Phosphorus                             |                |            | %     | 0,58                        | 0,57                            | 0,64                |
| Sodium                                 |                |            | %     | 0,39                        | 0,38                            | 0,20                |
| Magnesium                              |                |            | %     | 0,1                         | 0,1                             | 0,23                |
| Potassium                              |                |            | %     | 0,8                         | 0,8                             | 0,97                |
| Iron                                   |                |            | mg/kg | 72                          | 72                              | 168                 |
| Manganese                              |                |            | mg/kg | 22                          | 22                              | 95                  |
| Zinc                                   |                |            | mg/kg | 42                          | 42                              | 65                  |
| Copper                                 |                |            | mg/kg | 13                          | 13                              | 13                  |
| Iodine                                 |                |            | mg/kg | 0,31                        | 0,31                            | 1,16                |
| Selenium                               |                |            | mg/kg | 0,20                        | 0,20                            | 0,18                |
| Vitamin A                              |                |            | IU/kg | 15.900                      | 20.500                          | 15.000              |
| Vitamin D3                             |                |            | IU/kg | 1.550                       | 1.550                           | 1.500               |
| Vitamin E                              |                |            | mg/kg | 156                         | 159                             | 150                 |
| Vitamin C                              |                |            | mg/kg | 30                          | 30                              | 30                  |
| Vitamin K                              |                |            | mg/kg | 20                          | 20                              | 20                  |
| Vitamin B1                             |                |            | mg/kg | 26                          | 26                              | 25                  |
| Vitamin B2                             |                |            | mg/kg | 18                          | 18                              | 16                  |
| Vitamin B6                             |                |            | mg/kg | 17                          | 17                              | 16                  |
| Vitamin B12                            |                |            | µg/kg | 32                          | 32                              | 30                  |
| Niacin                                 |                |            | mg/kg | 53                          | 53                              | 47                  |
| Pantothenic acid                       |                |            | mg/kg | 59                          | 59                              | 55                  |
| Folic acid                             |                |            | mg/kg | 16                          | 16                              | 16                  |
| Biotin                                 |                |            | µg/kg | 355                         | 355                             | 300                 |
| Choline                                |                |            | mg/kg | 1.380                       | 1.380                           | 920                 |

***Table S2 – Echocardiography measurements for the cross over cohort***

Table S2 - Echocardiography measurements

| Measurement         | Group       | Timepoint | Mean      | SEM      |
|---------------------|-------------|-----------|-----------|----------|
| LVIDd               | LFD22       | Week 16   | 3.51611   | 0.07618  |
|                     |             | Week 24   | 3.49806   | 0.08546  |
|                     | FFMD 22     | Week 16   | 3.49469   | 0.07916  |
|                     |             | Week 24   | 3.73300   | 0.07665  |
|                     | FFMD 22->30 | Week 16   | 3.55239   | 0.07953  |
|                     |             | Week 24   | 3.88222   | 0.08431  |
|                     | FFMD 30->22 | Week 16   | 3.55553   | 0.06048  |
|                     |             | Week 24   | 3.76517   | 0.09172  |
|                     | FFMD 30     | Week 16   | 3.33806   | 0.11211  |
|                     |             | Week 24   | 3.77576   | 0.10272  |
| LV Mass             | LFD22       | Week 16   | 216.52600 | 3.10956  |
|                     |             | Week 24   | 208.88769 | 2.57885  |
|                     | FFMD 22     | Week 16   | 221.82781 | 4.33744  |
|                     |             | Week 24   | 217.92535 | 3.17026  |
|                     | FFMD 22->30 | Week 16   | 227.30017 | 5.44917  |
|                     |             | Week 24   | 224.21967 | 4.03695  |
|                     | FFMD 30->22 | Week 16   | 214.07053 | 3.72951  |
|                     |             | Week 24   | 225.00594 | 5.80649  |
|                     | FFMD 30     | Week 16   | 208.79188 | 4.52927  |
|                     |             | Week 24   | 216.19353 | 4.43880  |
| Rel. Wall Thickness | LFD22       | Week 16   | 0.43583   | 0.02262  |
|                     |             | Week 24   | 0.39169   | 0.01703  |
|                     | FFMD 22     | Week 16   | 0.45669   | 0.02136  |
|                     |             | Week 24   | 0.36618   | 0.01287  |
|                     | FFMD 22->30 | Week 16   | 0.45389   | 0.02174  |
|                     |             | Week 24   | 0.34756   | 0.01725  |
|                     | FFMD 30->22 | Week 16   | 0.38582   | 0.01717  |
|                     |             | Week 24   | 0.38339   | 0.01599  |
|                     | FFMD 30     | Week 16   | 0.44700   | 0.03356  |
|                     |             | Week 24   | 0.33565   | 0.01740  |
| IVRT                | LFD22       | Week 16   | 19.56811  | 0.86396  |
|                     |             | Week 24   | 22.27363  | 1.21101  |
|                     | FFMD 22     | Week 16   | 22.10106  | 1.73723  |
|                     |             | Week 24   | 24.25381  | 1.08151  |
|                     | FFMD 22->30 | Week 16   | 21.65094  | 1.64829  |
|                     |             | Week 24   | 23.73483  | 1.10349  |
|                     | FFMD 30->22 | Week 16   | 20.29469  | 1.55616  |
|                     |             | Week 24   | 21.86772  | 0.79514  |
|                     | FFMD 30     | Week 16   | 20.94818  | 1.44525  |
|                     |             | Week 24   | 23.28435  | 1.07163  |
| VTI                 | LFD22       | Week 16   | 19.79422  | 1.49440  |
|                     |             | Week 24   | 22.30544  | 1.07186  |
|                     | FFMD 22     | Week 16   | 16.52706  | 1.25873  |
|                     |             | Week 24   | 22.54282  | 1.02688  |
|                     | FFMD 22->30 | Week 16   | 16.88733  | 1.03026  |
|                     |             | Week 24   | 23.92061  | 1.14198  |
|                     | FFMD 30->22 | Week 16   | 18.15135  | 1.42952  |
|                     |             | Week 24   | 22.08017  | 0.94621  |
|                     | FFMD 30     | Week 16   | 18.40671  | 1.43910  |
|                     |             | Week 24   | 21.06800  | 0.61014  |
| VTI Peak Velocity   | LFD22       | Week 16   | 533.22378 | 28.02430 |
|                     |             | Week 24   | 520.05969 | 23.13816 |
|                     | FFMD 22     | Week 16   | 462.80250 | 36.04892 |
|                     |             | Week 24   | 516.83806 | 20.35915 |
|                     | FFMD 22->30 | Week 16   | 455.28072 | 23.67384 |
|                     |             | Week 24   | 519.62800 | 21.33008 |
|                     | FFMD 30->22 | Week 16   | 504.68318 | 28.16347 |
|                     |             | Week 24   | 538.95339 | 25.18737 |
|                     | FFMD 30     | Week 16   | 496.84053 | 31.98179 |
|                     |             | Week 24   | 473.46276 | 14.95940 |
| AET                 | LFD22       | Week 16   | 44.53678  | 1.90371  |
|                     |             | Week 24   | 51.63188  | 1.48961  |
|                     | FFMD 22     | Week 16   | 44.13856  | 1.59748  |
|                     |             | Week 24   | 52.87588  | 1.31289  |
|                     | FFMD 22->30 | Week 16   | 45.04633  | 1.51698  |
|                     |             | Week 24   | 55.47833  | 1.25816  |
|                     | FFMD 30->22 | Week 16   | 44.82018  | 1.58755  |
|                     |             | Week 24   | 51.01867  | 1.05836  |
|                     | FFMD 30     | Week 16   | 45.03241  | 1.78460  |
|                     |             | Week 24   | 54.31376  | 1.38299  |
| SV                  | LFD22       | Week 16   | 0.01950   | 0.00143  |
|                     |             | Week 24   | 0.02194   | 0.00104  |
|                     | FFMD 22     | Week 16   | 0.01606   | 0.00111  |
|                     |             | Week 24   | 0.02306   | 0.00145  |
|                     | FFMD 22->30 | Week 16   | 0.01789   | 0.00139  |
|                     |             | Week 24   | 0.02383   | 0.00136  |
|                     | FFMD 30->22 | Week 16   | 0.01831   | 0.00132  |
|                     |             | Week 24   | 0.02183   | 0.00136  |
|                     | FFMD 30     | Week 16   | 0.01806   | 0.00128  |
|                     |             | Week 24   | 0.02047   | 0.00100  |
